# Supplementary material
Source: PubMed Central journal article supplement (PMC10070372)
Supplement: BLOODA_ADV-2022-007026-mmc1.pdf [file BLOODA_ADV-2022-007026-mmc1.pdf]

## Supplementary Data for

# Posttransplantation Cyclophosphamide Expands Functional Myeloid-Derived Suppressor Cells and Indirectly Influences Tregs

Rochelle E. Fletcher,<sup>1</sup> Natalia S. Nunes,<sup>1</sup> Michael T. Patterson,<sup>1</sup> Natasha Vinod,<sup>1</sup> Shanzay M. Khan,<sup>1</sup> Suresh K. Mendu,<sup>1</sup> Xianghong Li,<sup>1</sup> Alessandra de Paula Pohl,<sup>1</sup> Lucas P. Wachsmuth,<sup>1</sup> Hyoyoung Choo-Wosoba,<sup>3</sup> Michael A. Eckhaus,<sup>2</sup> David J. Venzon,<sup>3</sup> Christopher G. Kanakry<sup>1</sup>

(1) Center for Immuno-Oncology, Center for Cancer Research, National Cancer Institute, National Institutes of Health, Bethesda, Maryland, USA;

(2) Division of Veterinary Resources, Office of Research Services, Office of the Director, National Institutes of Health, Bethesda, Maryland, USA;

(3) Biostatistics and Data Management Section, Office of the Clinical Director, Center for Cancer Research, National Cancer Institute, National Institutes of Health, Bethesda, Maryland, USA.

This PDF file includes:

### Supplementary Methods

**Table S1.** Representative examples of histopathologic assessment at day +6.

**Table S2.** Representative examples of histopathologic assessment at day +10.

**Figure S1.** Intermediate and high doses of post-transplantation cyclophosphamide (PTCy) increase percentages of myeloid-derived suppressor cells (MDSCs) at day +21.

**Figure S2.** Effect of PTCy at day +7 on specific markers that can influence the suppressive capabilities of G-MDSCs and M-MDSCs.

**Figure S3.** Effect of PTCy at day +21 on specific markers that can influence the suppressive capabilities of G-MDSCs and M-MDSCs.

**Figure S4.** *Ex vivo* anti-Gr1 depletion of the graft only transiently affects G-MDSCs and does not interfere with PTCy's impact on clinical GVHD, preferential MDSC recovery, or alloreactive T cells.

**Figure S5.** Efficacy of anti-Gr1 depletion in transplanted mice treated with or without PTCy.

**Figure S6.** Gr1<sup>+</sup> cell depletion at intermediate (day +28) and late (day +150) posttransplant time points has minimal impact on PTCy-treated mice.

**Figure S7.** PTCy does not protect against fatal GVHD induced by additional splenocyte infusion when PTCy is given to mice transplanted with only T-cell-depleted bone marrow.

## Supplementary Methods

*Antibodies for flow cytometry:* Mouse fluorochrome-conjugated monoclonal antibodies used for flow cytometry included: Brilliant Ultraviolet (BUV) 395 anti-CD3 (clone 145-2C11), Brilliant Violet (BV) 786 anti-CD8 (clone 53-6.7), BUV661 anti-CD11b (clone M1/70), PE anti-CD11c (clone HL3), BV650 anti-CD19 (clone 1D3), PE-CF594 anti-CD25 (clone PC61), Alexa Fluor (AF) 700 anti-CD44 (clone IM7), PE anti-CD45.1 (clone A20), APC anti-CD45.2 (Clone 104), BUV737 anti-CD62L (clone MEL-14), BV786 anti-CD80 (clone 16-10A1), PE/Cy7 anti-CD90.2 (clone 53-2.1), BV421 anti-CD124 (Clone mL4R-M1), BV711 anti-F4/80 (clone T45-2342), PE anti-H2K<sup>k</sup> (Clone 36-7-5), BV711 anti-H2K<sup>k</sup> (clone AF3-12.1), BV650 anti-MHC-II (clone M5/114.15.2), AF700 anti-Ly6G (Clone 1A8), and PE/Cy7 anti-PDL1 (clone 10F.9G2) from BD Biosciences; PE-Cy5 anti-CD8 (clone 53-6.7), APC/Fire 750 anti-CD40 (clone 3/23), APC anti-CD45.1 (clone A20), PE/Dazzle 594 anti-CD115 (CSF-1R) (clone AFS98), BV421 anti-CD11b (clone M1/70), AF647 anti-CD90.2 (clone 30-H12), PE anti-H2k<sup>d</sup> (clone SF1-1.1), PE-Cy7 anti-H2K<sup>d</sup> (clone SF1-1.1), BV605 anti-Ki-67 (clone 16A8), AF488 Ly6C (clone HK1.4), PE/Cy7 anti-Ly6G (clone 1A8), BV421 anti-NK1.1 (clone PK136), and BV711 anti-NK1.1 (clone PK136) from BioLegend; and APCefluor780 anti-CD4 (clone GK1.5), efluor450 anti-Foxp3 (clone FJK-16S), and PerCP-efluor710 anti-Vβ6 (clone RR4-7) from eBioscience. Human fluorochrome-conjugated monoclonal antibodies used for flow cytometry included BUV805 anti-CD14 (clone M5E2) and BUV395 anti-HLA-DR (clone G46-6) from BD Biosciences.

**Table S1. Representative examples of histopathologic assessment at day +6.**

|                                                                                                                                        | Skin                                                                              | Liver                                                                             | Stomach                                                                            | Small Intestine (SI)                                                                | Cecum                                                                               | Colon                                                                               |
|----------------------------------------------------------------------------------------------------------------------------------------|-----------------------------------------------------------------------------------|-----------------------------------------------------------------------------------|------------------------------------------------------------------------------------|-------------------------------------------------------------------------------------|-------------------------------------------------------------------------------------|-------------------------------------------------------------------------------------|
| <b>Allo BM/Splen, PBS, Isotype</b><br><br>Total Score: 9<br>Skin: 0      SI: 3<br>Liver: 1      Cecum: 1<br>Stomach: 2      Colon: 2   | 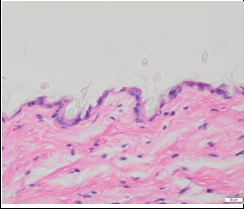 |  |  |  |  |  |
| <b>Allo BM/Splen, PBS, Anti-Gr1</b><br><br>Total Score: 10<br>Skin: 0      SI: 3<br>Liver: 1      Cecum: 2<br>Stomach: 2      Colon: 2 |  |  |  |  |  |  |

Notes: Allo, allogeneic; BM, bone marrow; Splen, splenocytes; PBS, phosphate-buffered saline.

**Table S2. Representative examples of histopathologic assessment at day +10.**

|                                                                                                                                          | Skin | Liver | Stomach | Small Intestine (SI) | Cecum | Colon |
|------------------------------------------------------------------------------------------------------------------------------------------|------|-------|---------|----------------------|-------|-------|
| <b>Syn BM/Splen,<br/>PTCy, Isotype</b><br><br>Total Score: 0<br>Skin: 0      SI: 0<br>Liver: 0      Cecum: 0<br>Stomach: 0    Colon: 0   |      |       |         |                      |       |       |
| <b>Syn BM/Splen,<br/>PTCy, Anti-Gr1</b><br><br>Total Score: 0<br>Skin: 0      SI: 0<br>Liver: 0      Cecum: 0<br>Stomach: 0    Colon: 0  |      |       |         |                      |       |       |
| <b>Allo BM/Splen,<br/>PBS, Isotype</b><br><br>Total Score: 10<br>Skin: 1      SI: 1<br>Liver: 2      Cecum: 2<br>Stomach: 2    Colon: 2  |      |       |         |                      |       |       |
| <b>Allo BM/Splen,<br/>PTCy, Isotype</b><br><br>Total Score: 5<br>Skin: 0      SI: 1<br>Liver: 1      Cecum: 1<br>Stomach: 1    Colon: 1  |      |       |         |                      |       |       |
| <b>Allo BM/Splen,<br/>PTCy, Anti-Gr1</b><br><br>Total Score: 3<br>Skin: 0      SI: 1<br>Liver: 0      Cecum: 1<br>Stomach: 0    Colon: 1 |      |       |         |                      |       |       |

Notes: Syn, syngeneic; BM, bone marrow; Splen, splenocytes; Allo, allogeneic; PBS, phosphate-buffered saline.

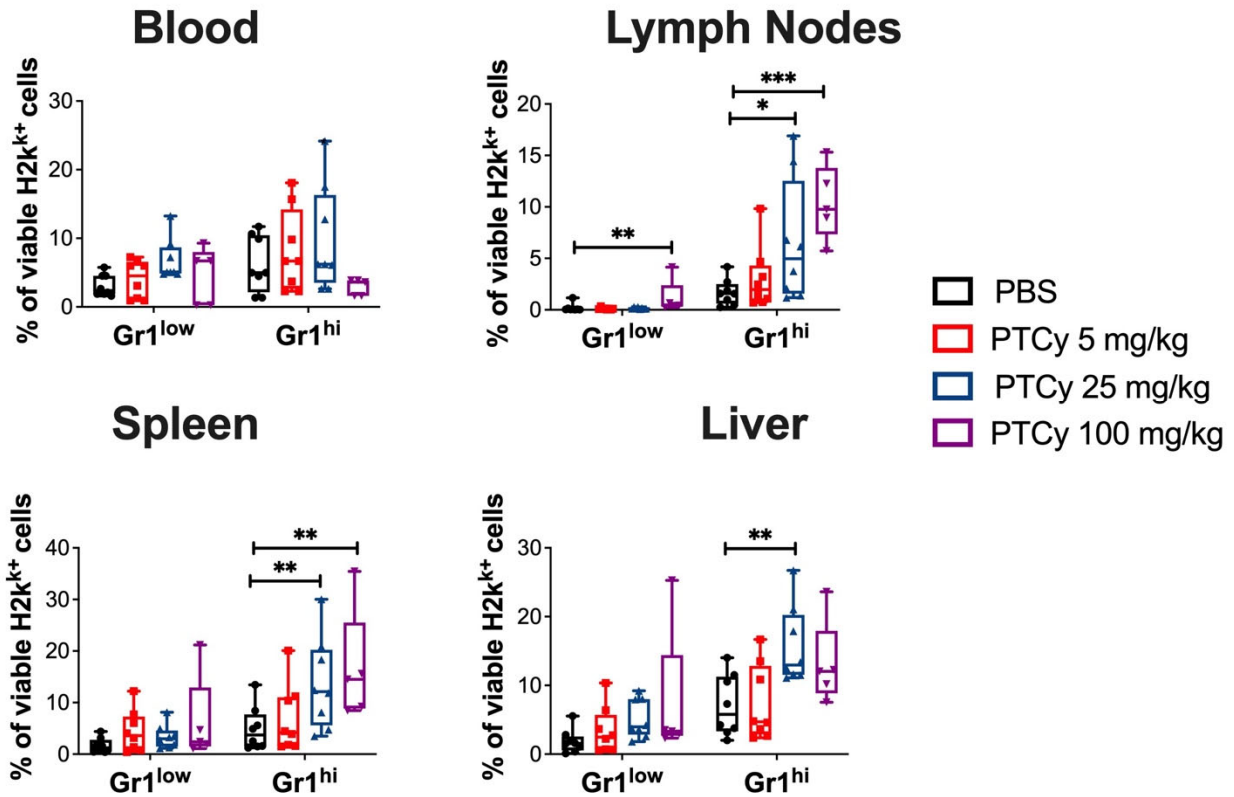

**Figure S1. Intermediate and high doses of post-transplantation cyclophosphamide (PTCy) increase percentages of myeloid-derived suppressor cells (MDSCs) at day +21.** On day 0, 10- to 12-week-old recipient female B6D2F1 mice were irradiated (10.5 Gy) and transplanted with  $10 \times 10^6$  T-cell-depleted bone marrow cells from 10- to 12-week-old female wildtype B6C3F1 donors. Phosphate-buffered saline (PBS) vehicle or 25 mg/kg/day PTCy was administered on days +3 and +4. Mice were euthanized at day +21, and different tissues were processed and assessed by flow cytometry. CD11b and relative Gr1 expression were used to gate MDSC subsets off B220<sup>+</sup>NK1.1<sup>-</sup>CD3<sup>-</sup> donor cells. Class I (H2k<sup>k</sup> vs. H2k<sup>d</sup>) expression was used to define donor, potentially leading to lower percentages of MDSCs than found when gating on CD45.1<sup>+</sup> cells in **Figure 3**. Combined results from two independent experiments are shown with n=4/group/experiment except for PTCy 100 mg/kg (n=5 total due to early deaths). \*p < 0.05, \*\*p < 0.01, and \*\*\*p < 0.001 on one-way ANOVA with the Holm-Sidak post hoc test using the PBS vehicle group as the control. Statistical comparisons with the PBS group that are not shown had p > 0.05.

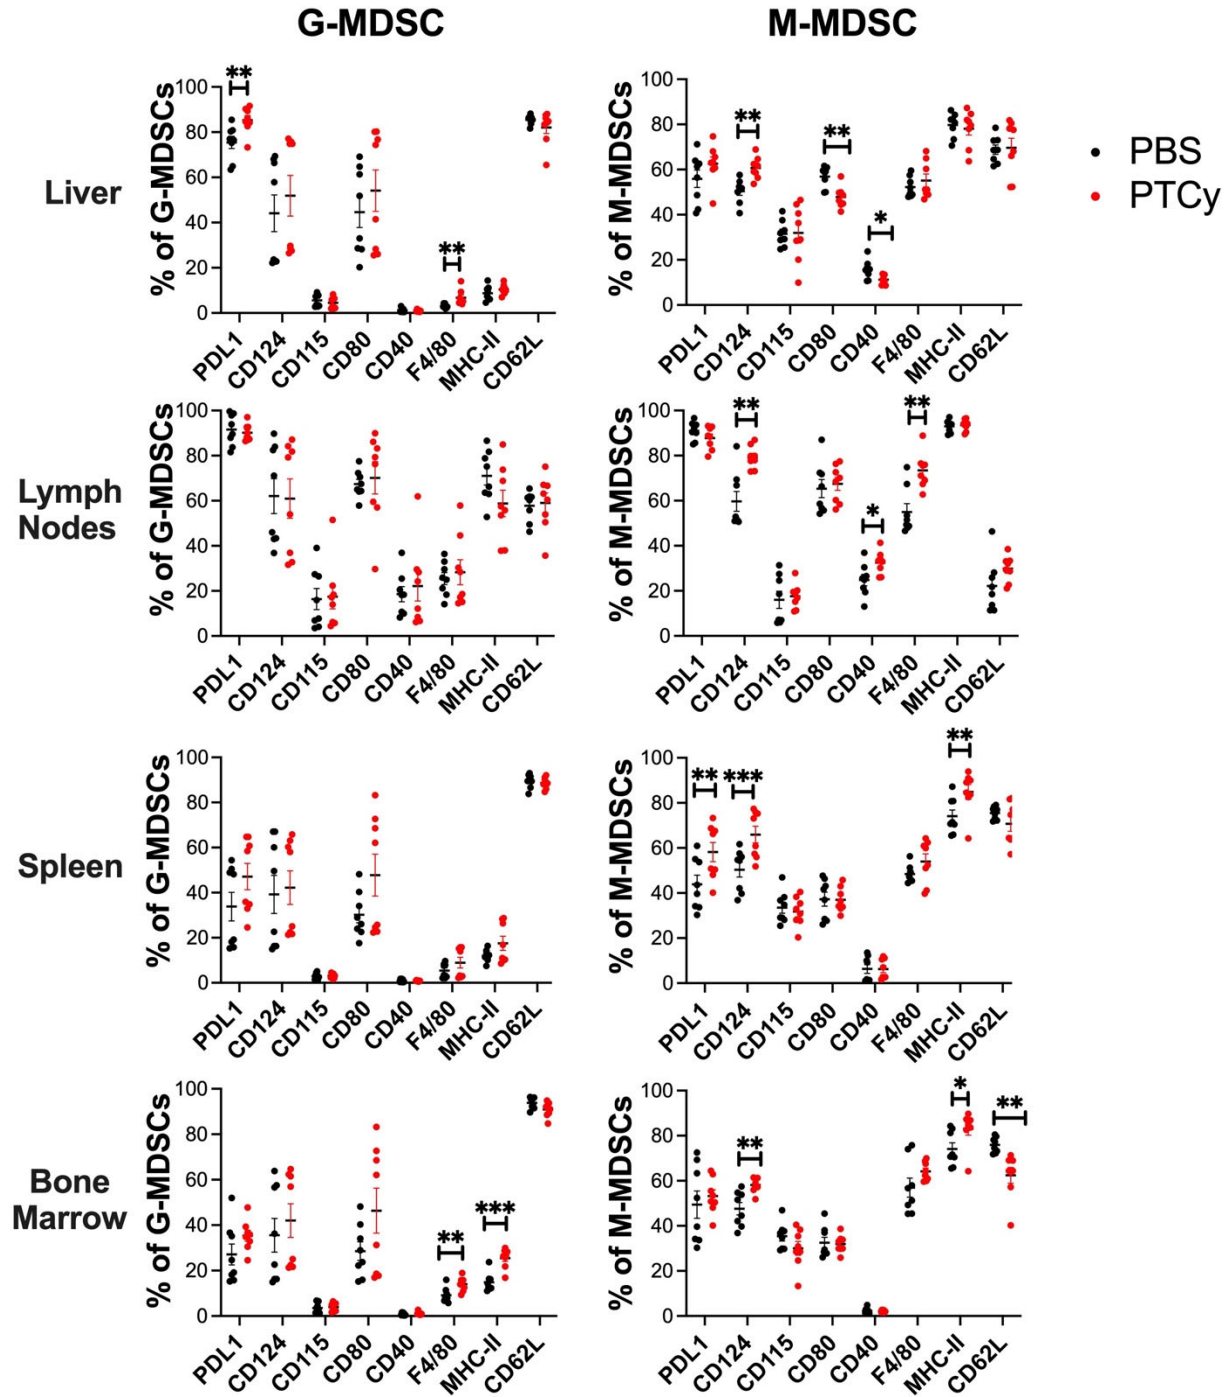

**Figure S2. Effect of PTCy at day +7 on specific markers that can influence the suppressive capabilities of G-MDSCs and M-MDSCs.** Mice transplanted in **Figure 3B** were assessed for a variety of cell surface markers associated with MDSCs. Combined results from two independent experiments are shown with n=4 mice/group/experiment. \*p < 0.05, \*\*p < 0.01, and \*\*\*p < 0.001 on unpaired t-test.

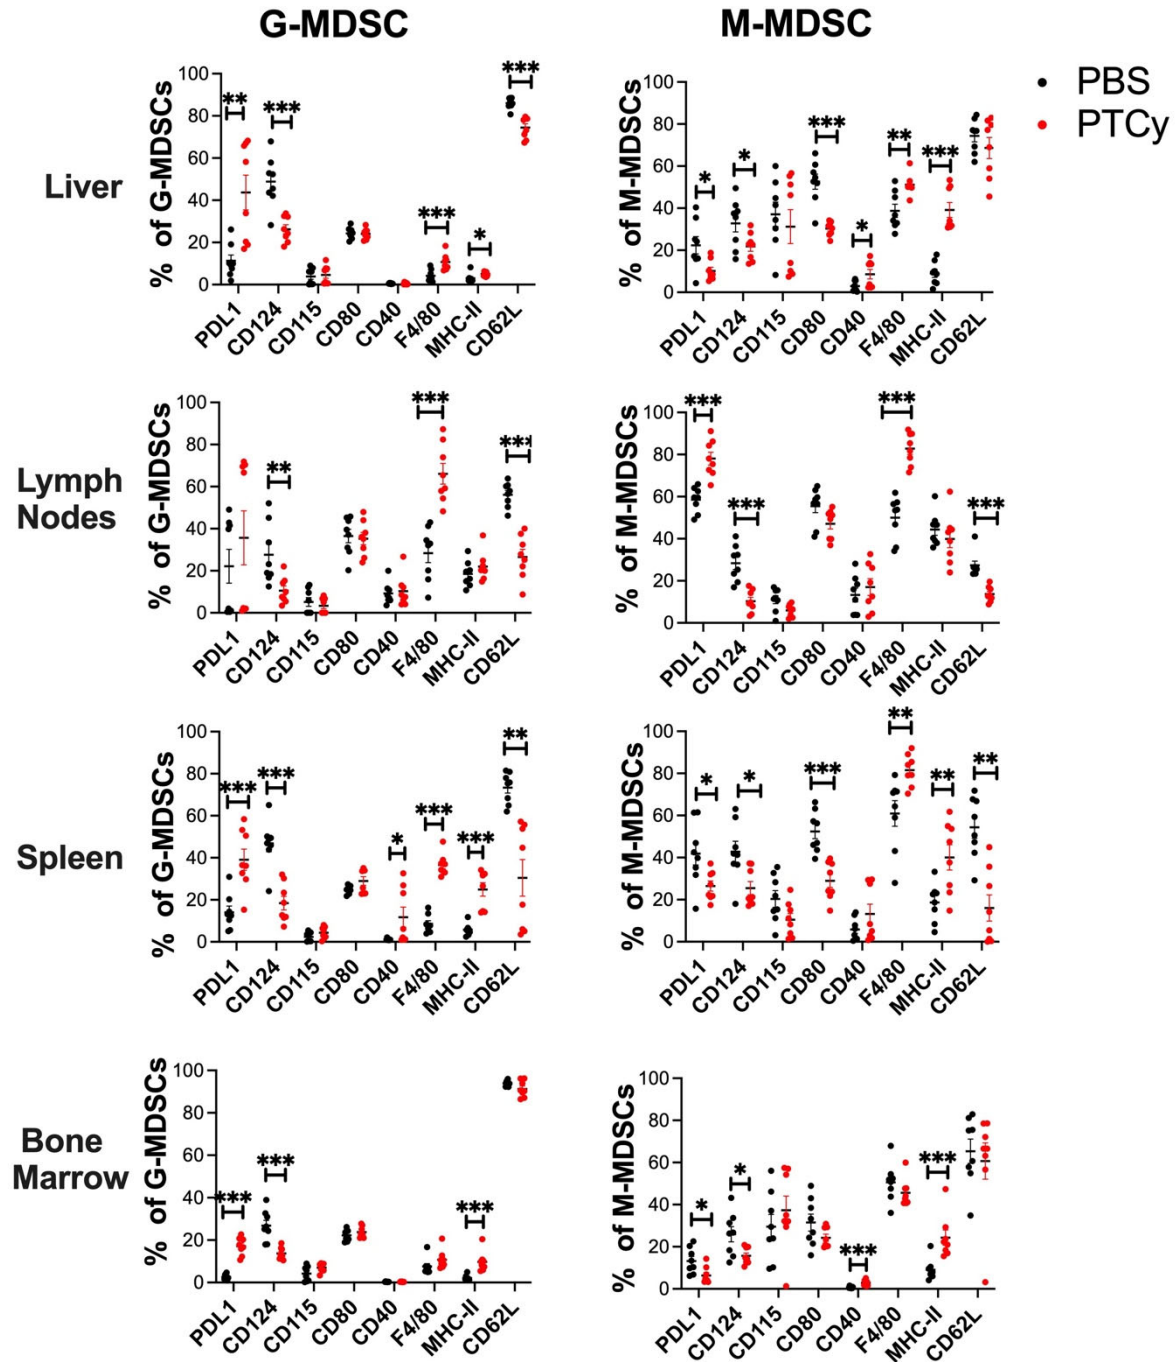

**Figure S3. Effect of PTCy at day +21 on specific markers that can influence the suppressive capabilities of G-MDSCs and M-MDSCs.** Mice transplanted in **Figure 3B** were assessed for a variety of cell surface markers associated with MDSCs. Combined results from two independent experiments are shown with n=4 mice/group/experiment. \*p < 0.05, \*\*p < 0.01, and \*\*\*p < 0.001 on unpaired t-test.

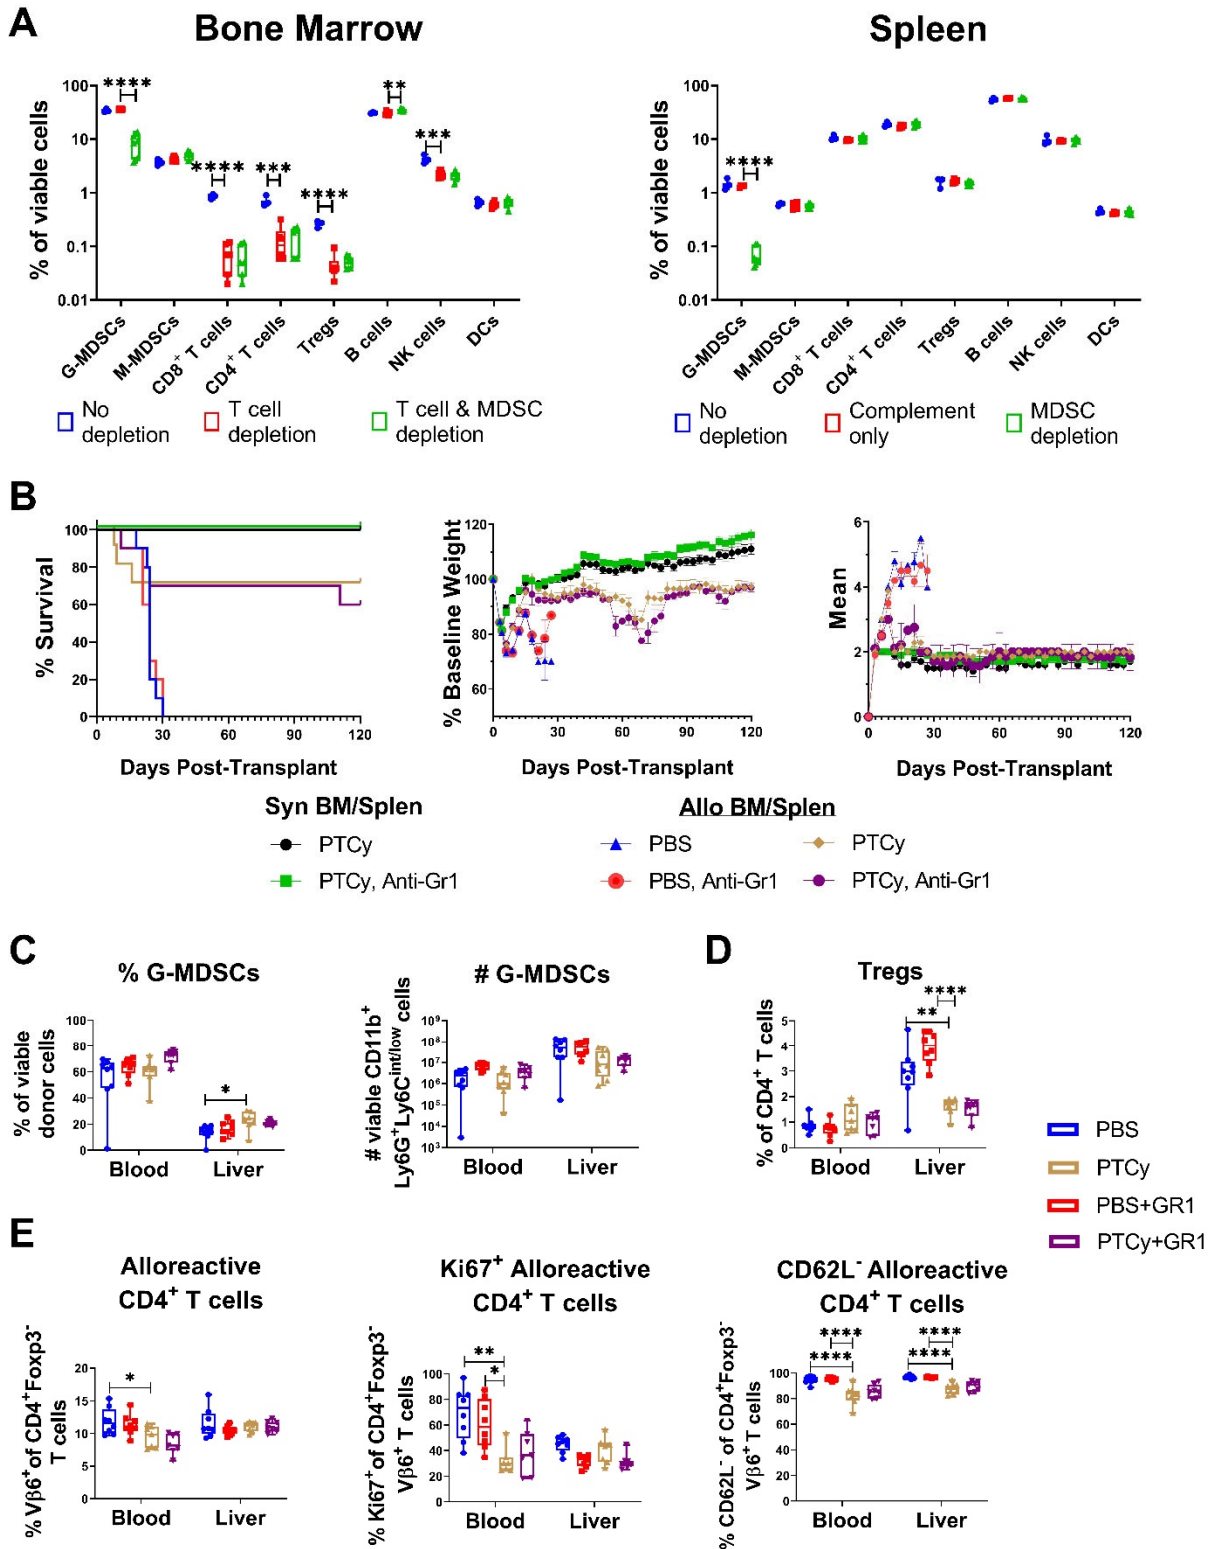

Figure S4. *Ex vivo* anti-Gr1 depletion of the graft only transiently affects G-MDSCs and does not interfere with PTCy's impact on clinical GVHD, preferential MDSC recovery, or alloreactive T cells. To attempt to deplete MDSCs within the allograft, bone marrow or spleen from donor B6C3F1 mice was



treated with anti-Gr1 antibody *in vitro*. These cells (or non-depleted cells) were used as the allografts for transplantation as per **Figure S1**. Syngeneic indicates B6D2F1 → B6D2F1. **(A)** Anti-Gr1 *ex vivo* treatment substantially reduced percentages of G-MDSCs but did not affect M-MDSCs. This depletion was achieved with minimal impact on other immune subsets. Combined results of three independent experiments are shown. Comparisons were performed with one-way ANOVA followed by Holm-Sidak post tests using the T-cell depletion (bone marrow) or Complement only (spleen) groups as the comparator group. **(B)** *Ex vivo* anti-Gr1 depletion had no significant impact on survival or clinical GVHD in PTCy-treated mice. Combined results of two independent experiments of 5 mice/group/experiment are shown. **(C)** This lack of an effect likely was due to the very transient nature of the depletion. By day +7, G-MDSC levels in mice receiving G-MDSC-depleted grafts were similar to mice receiving non-depleted grafts. **(D-E)** Consequently, this G-MDSC transient depletion did not interfere with the impact of PTCy on **(D)** regulatory or **(E)** alloreactive (Vβ6<sup>+</sup>) conventional CD4<sup>+</sup> T cells, including the percentages of alloreactive conventional CD4<sup>+</sup> T cells that were proliferating or differentiated. For **C-E**, combined results of two independent experiments are shown with n=4 mice/group/experiment. For **A, C-E**, comparisons were performed with one-way ANOVA followed by the Holm-Sidak post test. The comparator groups were the T-cell depletion (bone marrow) or Complement only (spleen) groups for **A** and the PTCy/no depletion group for **C-E**. \*p < 0.05, \*\*p < 0.01, \*\*\*p < 0.001, and \*\*\*\*p < 0.0001. Only significant differences are shown.

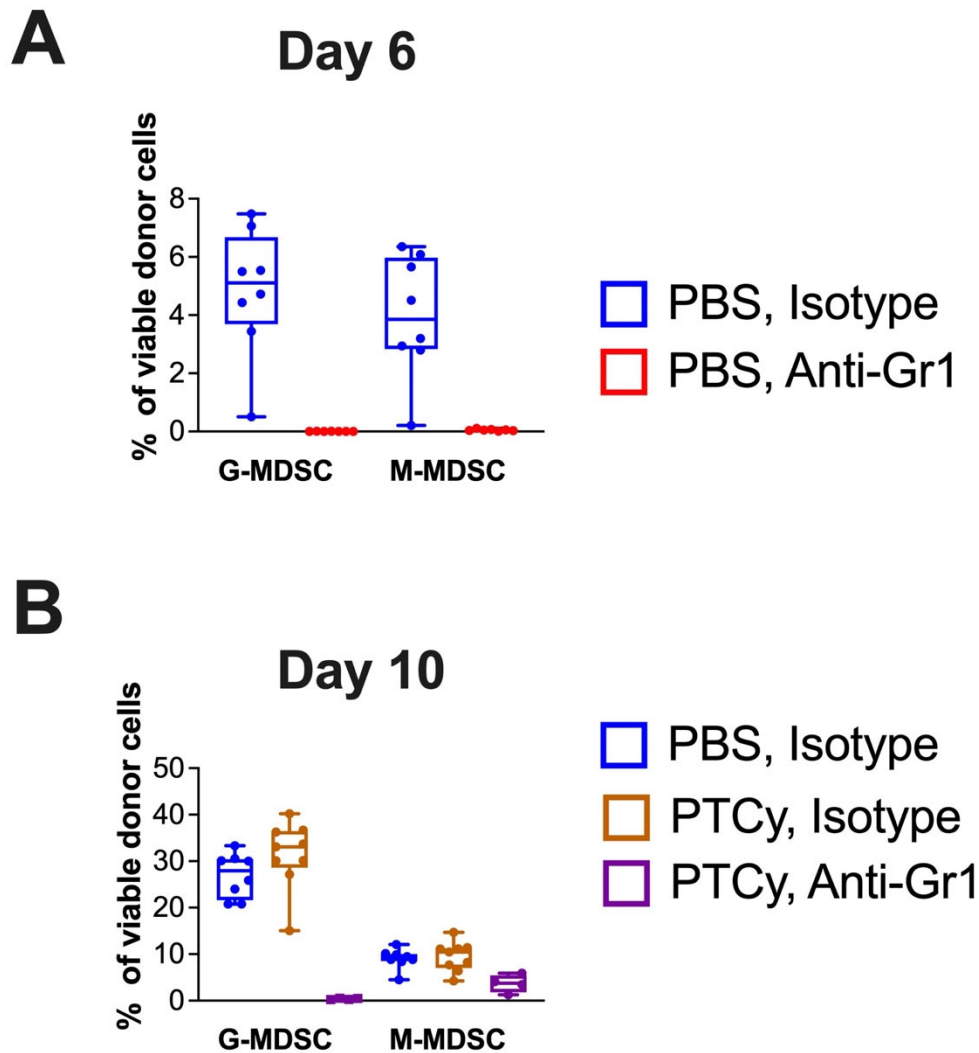

**Figure S5. Efficacy of anti-Gr1 depletion in transplanted mice treated with or without PTCy.** For mice transplanted in **Figure 7**, percentage of viable donor cells that were G-MDSCs ( $CD11b^+Ly6G^+Ly6C^{int/low}$ ) or M-MDSCs ( $CD11b^+Ly6G^-Ly6C^{high}$ ) were assessed in the liver. Combined results from two independent experiments are shown with total  $n=4$ /group/experiment except for the Allo PTCy Anti-Gr1 group ( $n=4$  total due to excess deaths prior to day +10).

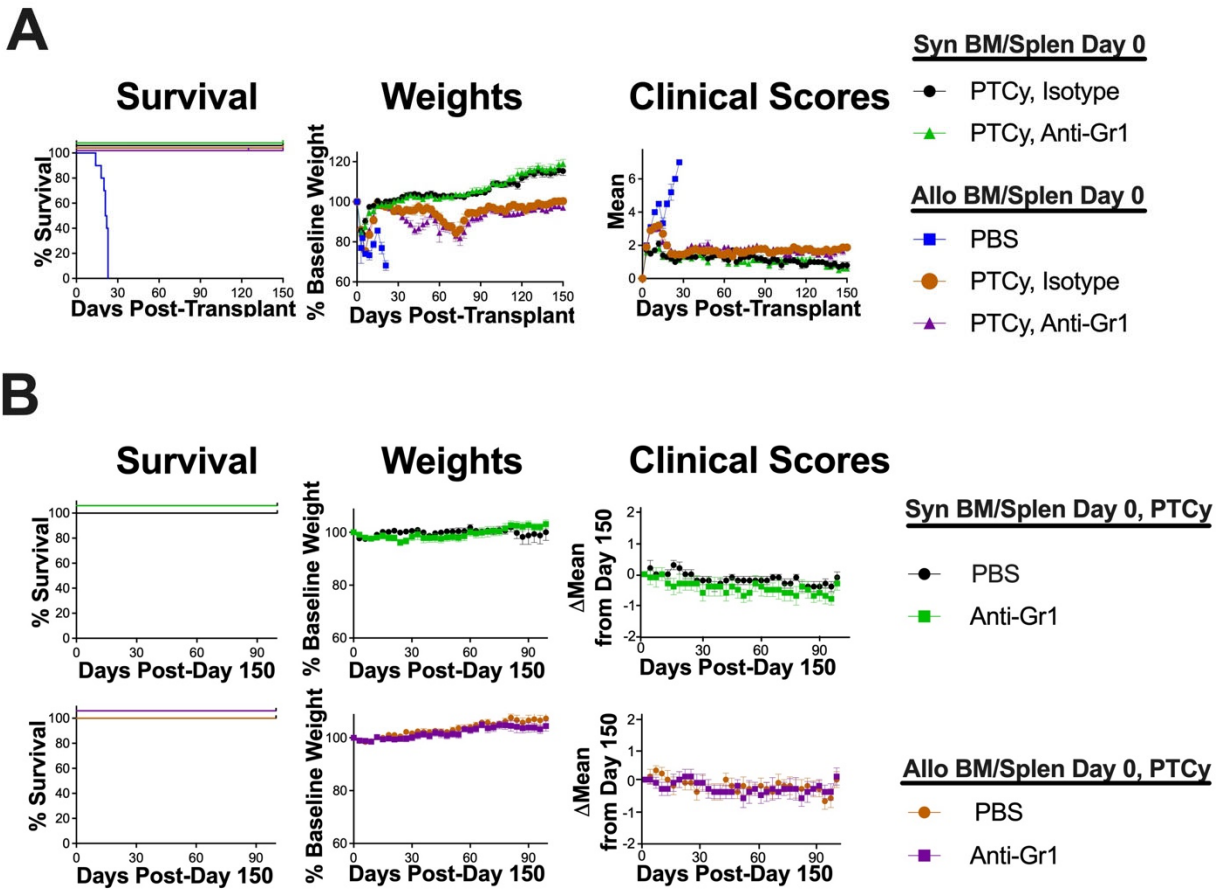

**Figure S6. Gr1<sup>+</sup> cell depletion at intermediate (day +28) and late (day +150) posttransplant time points has minimal impact on PTCy-treated mice.** Mice were treated as in **Figure 6** except that anti-Gr1 or isotype control antibody was given on (A) days +28, +32, +36, and +40 or (B) days +150, +154, +158, and +162. Combined results from (A) two or (B) four independent experiments with n=5 and n=2-3 mice/group/experiment, respectively. Baseline weight for B was the day +150 weight at the start of treatment for each mouse.

**A**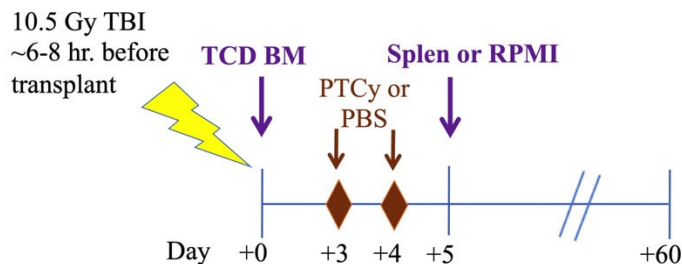**B**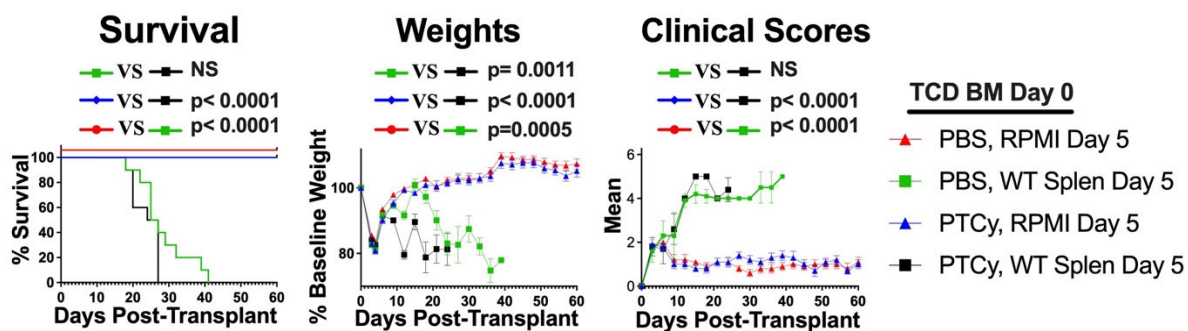

**Figure S7. PTCy does not protect against fatal GVHD induced by additional splenocyte infusion when PTCy is given to mice transplanted with only T-cell-depleted bone marrow.** On day 0, 10- to 12-week-old recipient female B6D2F1 mice were irradiated (10.5 Gy) and transplanted with  $10 \times 10^6$  T-cell-depleted (TCD) bone marrow (BM) cells from 10- to 12-week-old female wildtype B6C3F1 donors. Phosphate-buffered saline (PBS) vehicle or 25 mg/kg/day PTCy was administered on days +3 and +4. On day +5,  $40 \times 10^6$  red-blood-cell-depleted wildtype splenocytes or RPMI were infused. Combined results are shown from two independent experiments of  $n=5$  mice/group/experiment. Survival outcomes were compared using the exact log-rank test, and area-under-the-curve comparisons of weights and clinical scores were performed using Wilcoxon's rank sum test.
